# Supplementary material for: Mechanistic insights for electrochemical reduction of CO2 into hydrocarbon fuels over O-terminated MXenes
Source: Royal Society of Chemistry journal article supplement (doi:10.1039/d1cy02188e), 2022-01-01
Supplement: d1cy02188e1.pdf [file d1cy02188e1.pdf]

## Supporting Information

### **Mechanistic insights for electrochemical reduction of CO<sub>2</sub> into hydrocarbon fuels over O-terminated MXenes**

Vanshree Parey<sup>1†</sup>, B. Moses Abraham<sup>1†</sup>, M. V. Jyothirmai<sup>1</sup> and Jayant K. Singh<sup>1,2\*</sup>

<sup>1</sup>Department of Chemical Engineering, Indian Institute of Technology Kanpur, Kanpur-208016, India.

<sup>2</sup>Prescience Insilico Private Limited, Bangalore 560049, India.

\*E-mail: jayantks@iitk.ac.in

<sup>†</sup>Equal contribution

**Table S1:** The adsorption configuration and bond distance (Å) between adsorbed intermediate and the  $M_2XO_2$  ( $M = \text{Ti}$  and  $\text{Zr}$ ;  $X = \text{C}, \text{N}$  and  $\text{B}$ ) MXenes.

|  | $\text{Ti}_2\text{CO}_2$ | $\text{Zr}_2\text{CO}_2$ | $\text{Ti}_2\text{NO}_2$ | $\text{Zr}_2\text{NO}_2$ | $\text{Ti}_2\text{BO}_2$ | $\text{Zr}_2\text{BO}_2$ |       |
|--|--------------------------|--------------------------|--------------------------|--------------------------|--------------------------|--------------------------|-------|
|  | * $\text{CO}_2$          | 2.469                    | 2.325                    | 2.507                    | 2.372                    | 2.348                    | 2.365 |
|  | * $\text{COOH}$          | 1.374                    | 1.363                    | 1.387                    | 1.371                    | 1.370                    | 1.359 |
|  | * $\text{HCOOH}$         | 1.925                    | 1.864                    | 1.956                    | 1.872                    | 1.933                    | 1.827 |
|  | * $\text{CHO}$           | 1.405                    | 1.387                    | 1.411                    | 1.389                    | 1.414                    | 1.382 |
|  | * $\text{H}_2\text{CO}$  | 2.384                    | 2.280                    | 2.479                    | 2.370                    | 2.357                    | 2.290 |
|  | * $\text{CH}_2\text{OH}$ | 1.475                    | 1.451                    | 1.491                    | 1.466                    | 1.510                    | 1.460 |
|  | * $\text{HOCH}_3$        | 1.981                    | 1.997                    | 1.987                    | 2.003                    | 1.951                    | 1.939 |
|  | * $\text{CH}_3$          | 1.446                    | 1.444                    | 1.444                    | 1.457                    | 1.463                    | 1.444 |
|  | * $\text{CH}_4$          | 1.916                    | 1.943                    | 1.926                    | 1.965                    | 1.911                    | 1.927 |

**Table S2:** Gibbs free energies (in eV) corresponding to various intermediates along the CO<sub>2</sub> conversion pathway catalysed by M<sub>2</sub>XO<sub>2</sub> (M = Ti and Zr; X = C, N and B) MXenes.

|                         | e <sup>-</sup> transferred | Ti <sub>2</sub> CO <sub>2</sub> | Zr <sub>2</sub> CO <sub>2</sub> | Ti <sub>2</sub> NO <sub>2</sub> | Zr <sub>2</sub> NO <sub>2</sub> | Ti <sub>2</sub> BO <sub>2</sub> | Zr <sub>2</sub> BO <sub>2</sub> |
|-------------------------|----------------------------|---------------------------------|---------------------------------|---------------------------------|---------------------------------|---------------------------------|---------------------------------|
| <b>Surface</b>          | 0                          | 0                               | 0                               | 0                               | 0                               | 0                               | 0                               |
| <b>CO<sub>2</sub></b>   | 1                          | 0.65                            | 0.61                            | 0.58                            | 0.45                            | 0.65                            | 0.61                            |
| <b>COOH</b>             | 2                          | 0.58                            | 1.15                            | 0.61                            | 0.89                            | 0.32                            | 0.43                            |
| <b>HCOOH</b>            | 3                          | 0.5                             | 0.36                            | 0.19                            | 0.51                            | 0.15                            | 0.51                            |
| <b>CHO</b>              | 4                          | 0.59                            | 1.19                            | 0.72                            | 0.89                            | 0.43                            | 0.47                            |
| <b>H<sub>2</sub>CO</b>  | 5                          | 1.12                            | 0.98                            | 1.12                            | 0.84                            | 1.12                            | 1.07                            |
| <b>CH<sub>2</sub>OH</b> | 6                          | -0.17                           | 0.52                            | -0.12                           | 0.18                            | -0.54                           | -0.44                           |
| <b>HOCH<sub>3</sub></b> | 7                          | -0.18                           | -0.31                           | -0.63                           | -0.2                            | -0.17                           | -0.33                           |
| <b>CH<sub>3</sub></b>   | 8                          | -0.73                           | 0.01                            | -0.81                           | -0.31                           | -0.85                           | -1.14                           |
| <b>CH<sub>4</sub></b>   | 9                          | -1.22                           | -1.4                            | -1.16                           | -1.33                           | -1.01                           | -1.71                           |

**Table S3:** Computed U<sub>L</sub>(CO<sub>2</sub>), U<sub>L</sub>(H<sub>2</sub>) and U<sub>L</sub>(CO<sub>2</sub>) - U<sub>L</sub>(H<sub>2</sub>).

| System                              | U <sub>L</sub> (CO <sub>2</sub> ) (V) | U <sub>L</sub> (H <sub>2</sub> ) (V) | U <sub>L</sub> (CO <sub>2</sub> ) - U <sub>L</sub> (H <sub>2</sub> ) (V) |
|-------------------------------------|---------------------------------------|--------------------------------------|--------------------------------------------------------------------------|
| <b>Ti<sub>2</sub>CO<sub>2</sub></b> | -0.653                                | -0.466                               | -0.187                                                                   |
| <b>Zr<sub>2</sub>CO<sub>2</sub></b> | -0.606                                | -0.162                               | -0.444                                                                   |
| <b>Ti<sub>2</sub>NO<sub>2</sub></b> | -0.575                                | -0.454                               | -0.121                                                                   |
| <b>Zr<sub>2</sub>NO<sub>2</sub></b> | -0.446                                | -0.509                               | 0.063                                                                    |
| <b>Ti<sub>2</sub>BO<sub>2</sub></b> | -0.646                                | -0.384                               | -0.261                                                                   |
| <b>Zr<sub>2</sub>BO<sub>2</sub></b> | -0.608                                | 0.201                                | -0.809                                                                   |

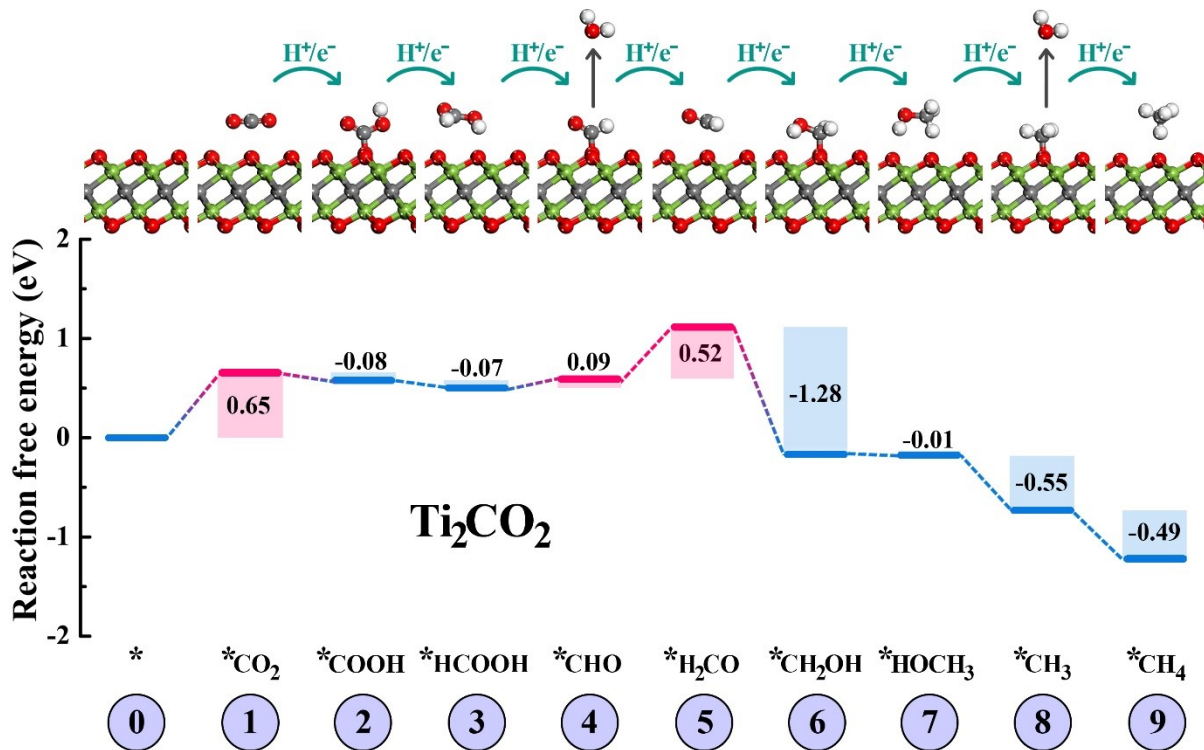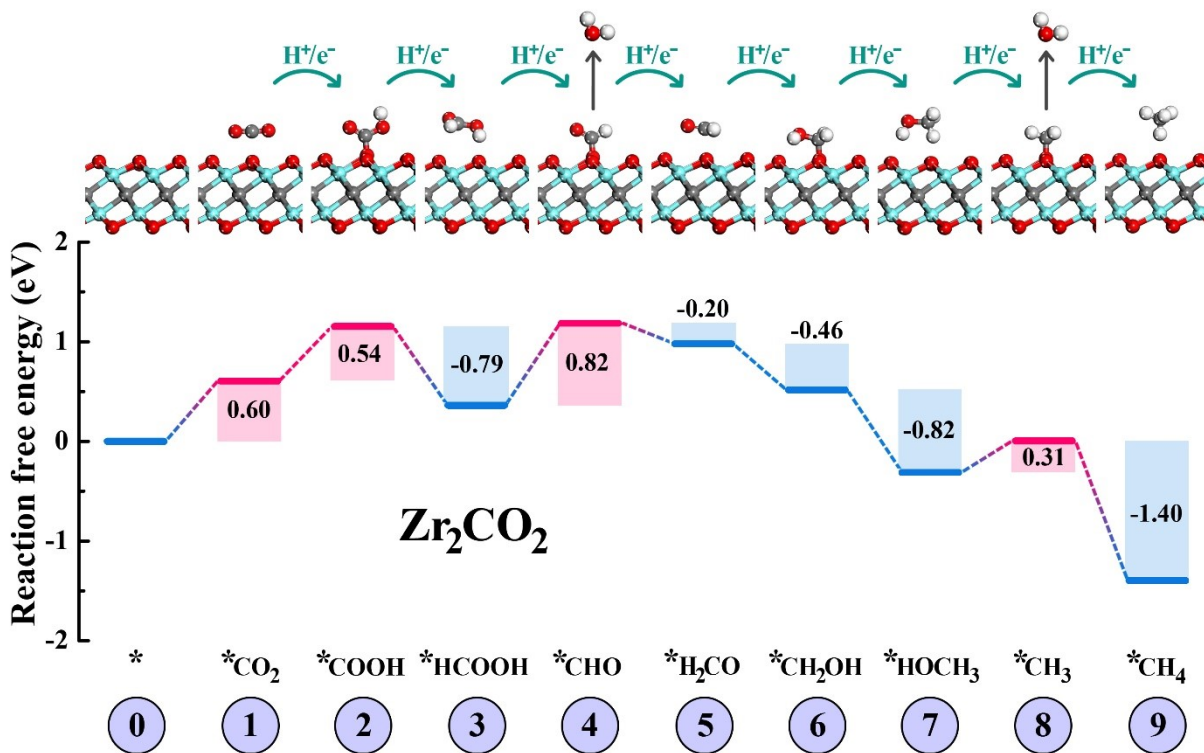

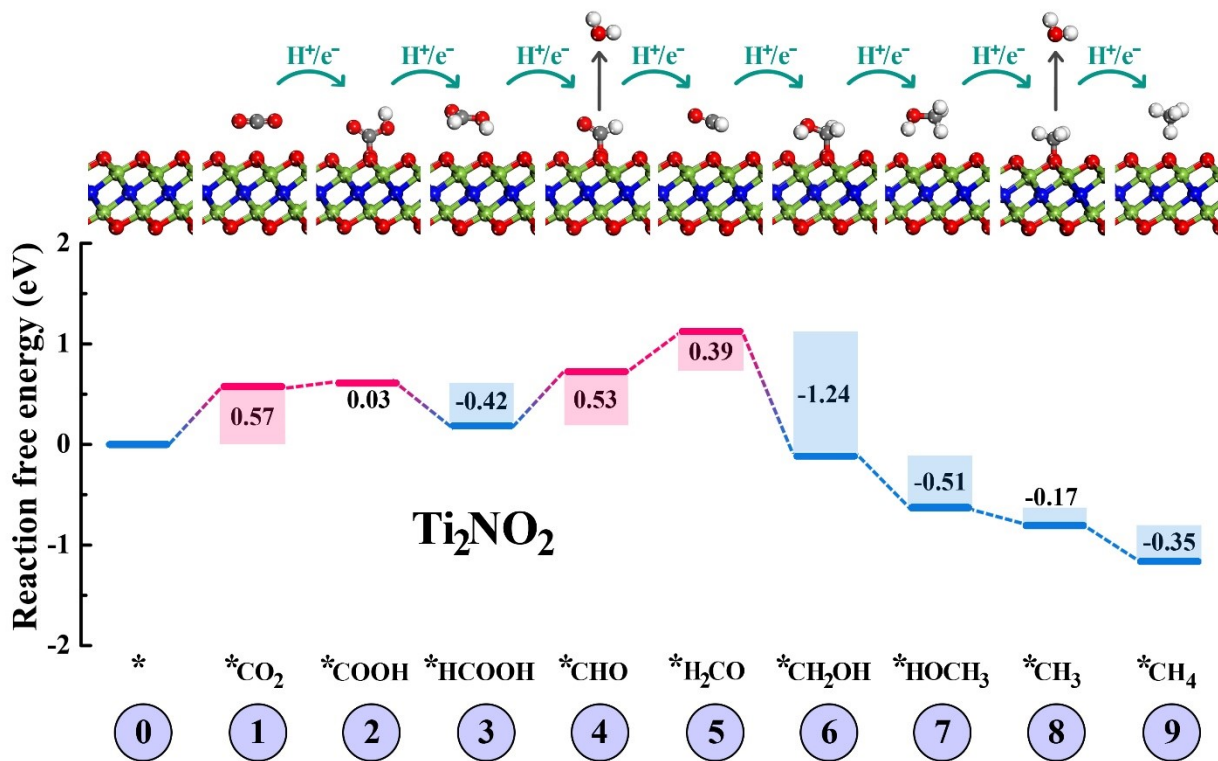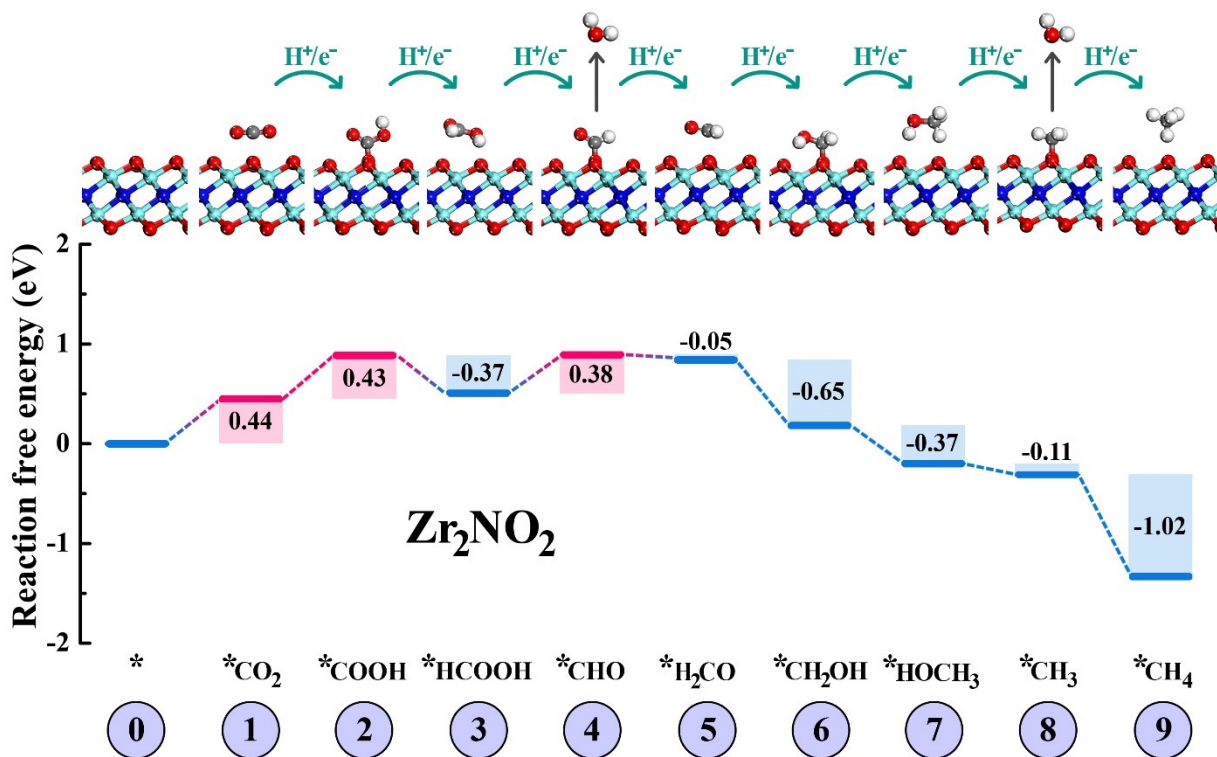

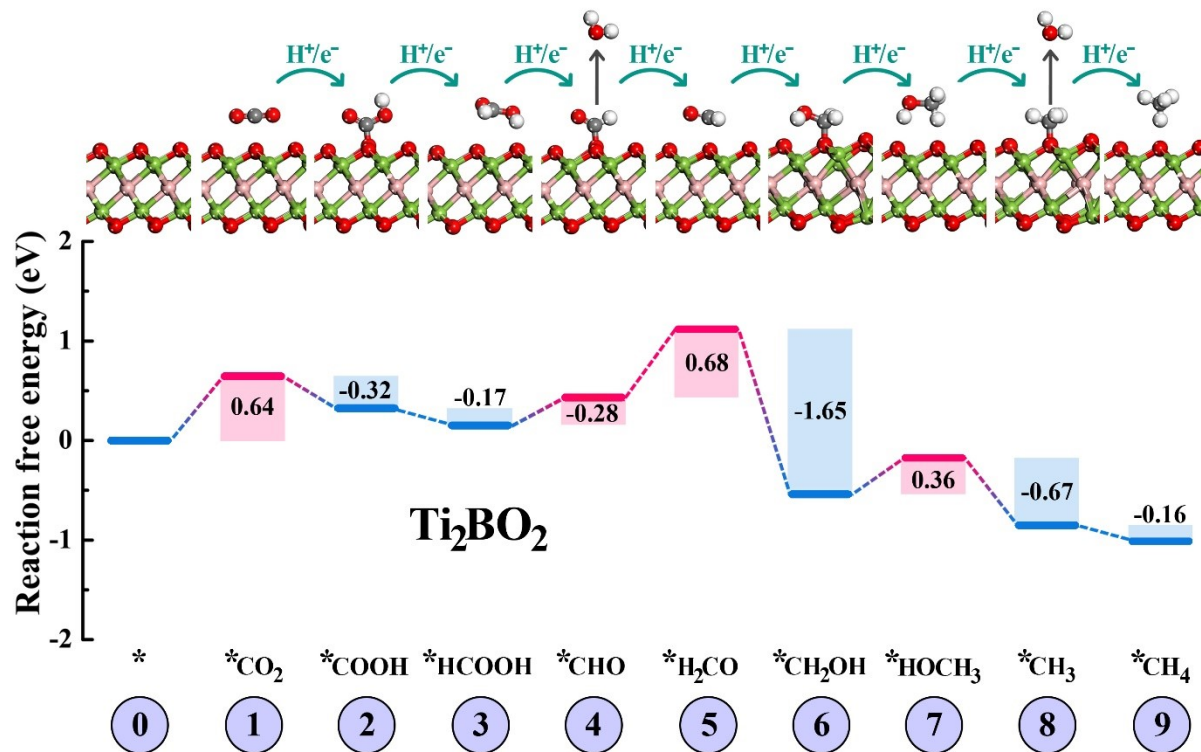

**Figure S1:** Free energy diagrams of the overall CO<sub>2</sub>RR for M<sub>2</sub>XO<sub>2</sub> (M = Ti and Zr; X = C, N and B) MXenes. Arrow represents the transfer of (H<sup>+</sup>+e<sup>-</sup>) pair in the CO<sub>2</sub> reduction pathway. Here white, red, gray, blue, pink, green and cyan spheres refer to H, O, C, N, B, Ti and Zr atoms, respectively.
